# Supplementary material
Source: publisher site journal article supplement (https://www.spandidos-publications.com/2527/downloadSupplementary)

Figure S1. circFOXO3 shows no effects on the apoptotic pathway in the absence of radiation in cardiomyocytes. Protein expression levels of Bax, Bcl-2 and caspase-3 were evaluated by western blotting in AC16 cells with or without circFOXO3 KD or OE in the absence of radiation. circ, circular RNA; OE, overexpression; KD, knockdown; NC, negative control.

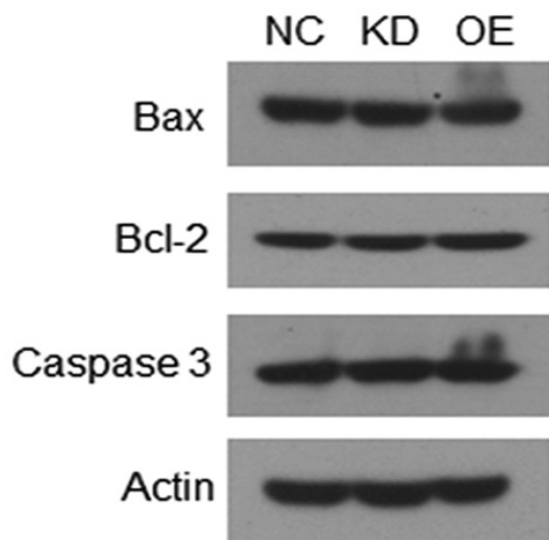

Supplement: Supplementary file 1 [file downloadSupplementary]
